# Supplementary material for: Assessing the utility of gene co-expression stability in combination with correlation in the analysis of protein-protein interaction networks
Source: PubMed Central journal article supplement (PMC3333178; doi:10.1186/1471-2164-12-s3-s19), 2011-11-30
Supplement: 1471-2164-12-S3-S19-S1.pdf [file 1471-2164-12-S3-S19-S1.pdf]

## Supplementary Materials

### Supplementary Figures

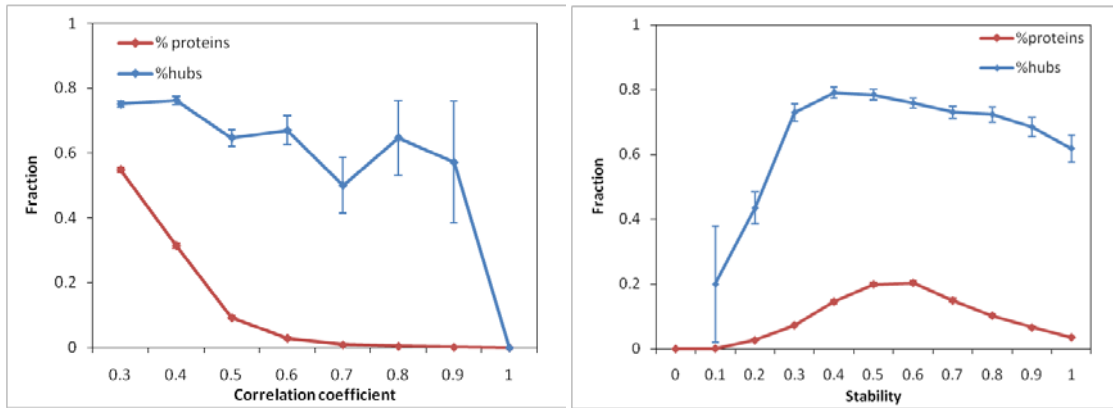

a)

b)

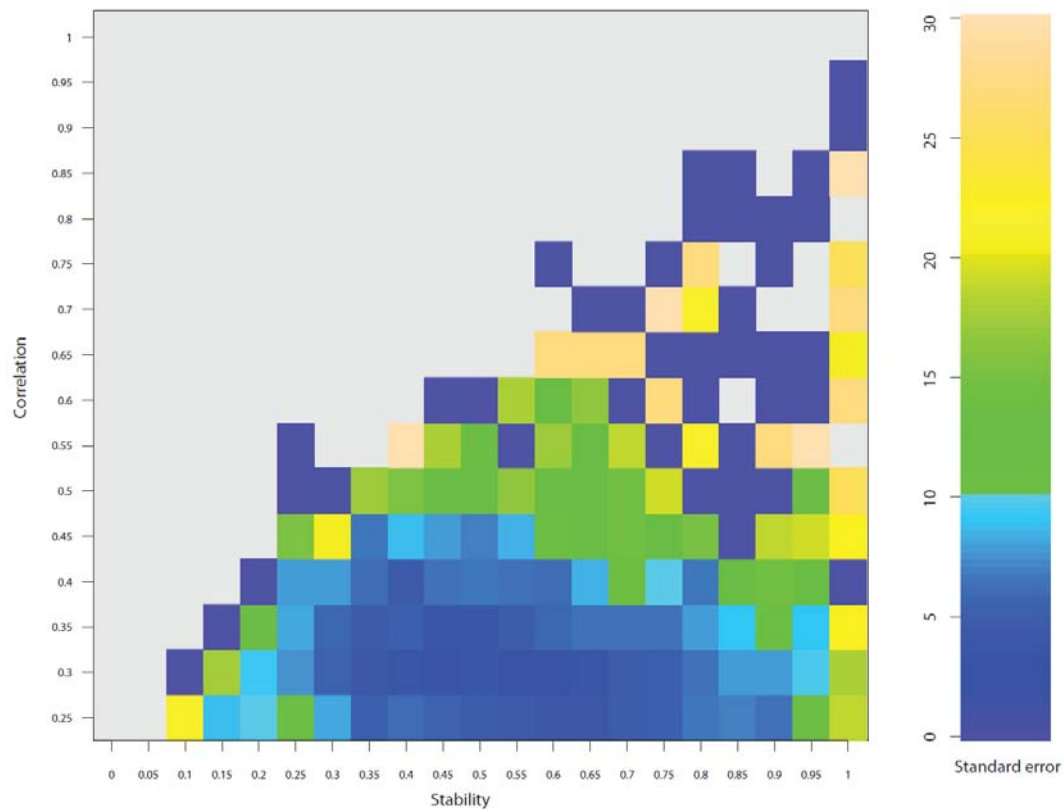

c)

Figure S1. Frequency of proteins and the prevalence of hubs in them, at varying levels of the average co-expression a) correlation and b) stability of proteins with their interaction partners. c) Standard error for frequency of hubs in heatmap shown in Figure 2. Gray regions indicate undefined values.

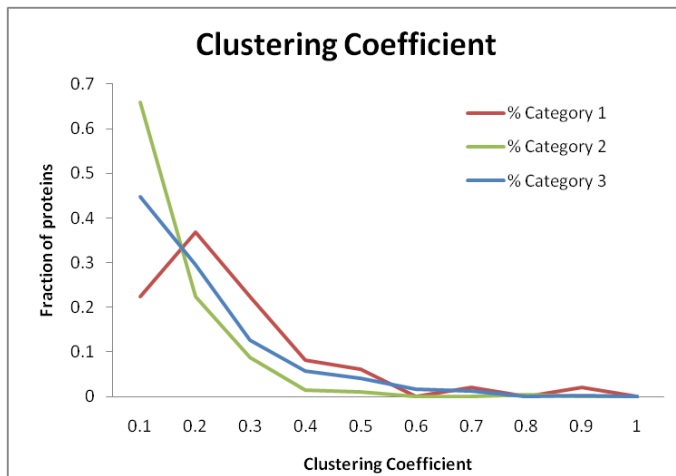

a)

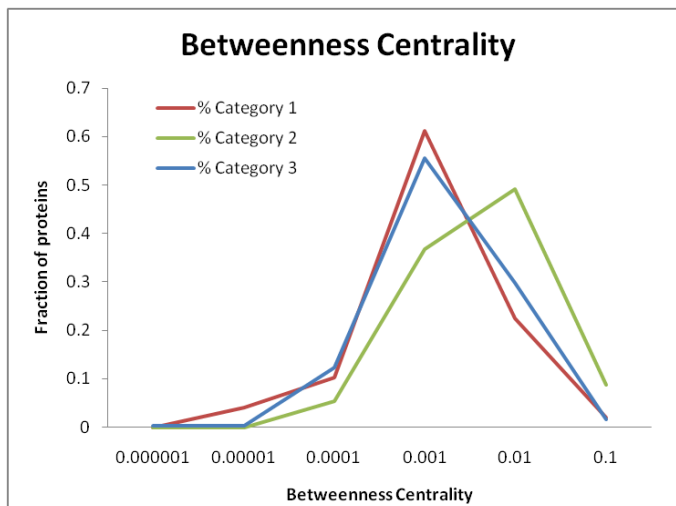

b)

**Figure S2.** Distribution of a) Clustering coefficient (CC) and b) Betweenness centrality (BC) for three categories of hubs as defined by their average coexpression correlation and stability with their interaction partners. Category 1 – correlation > 0.5, stability > 0.5; Category 2 – correlation ≤ 0.5, stability > 0.5; Category 3 – correlation ≤ 0.5, stability ≤ 0.5. All differences in the distributions of BC and CC are statistically significant at  $p \ll 0.001$ .

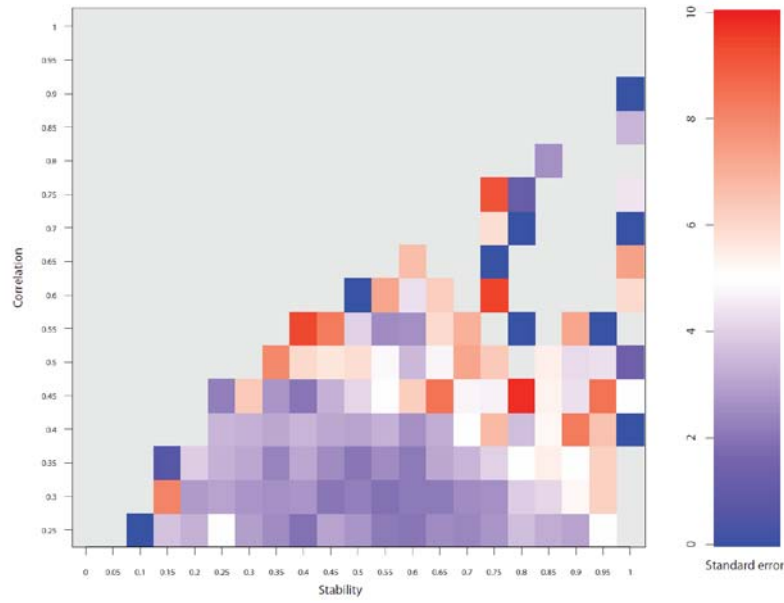

a)

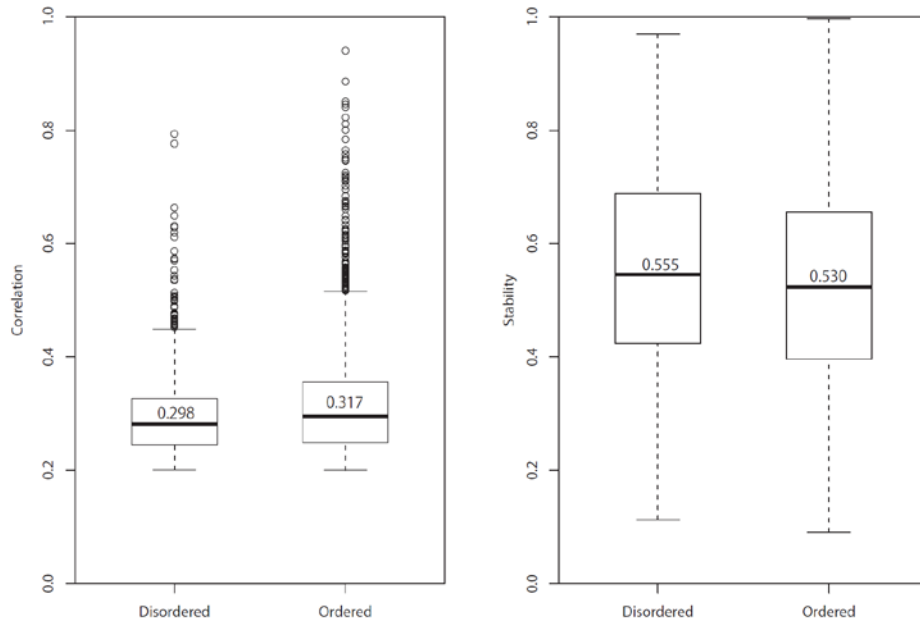

b)

Figure S3. a) Standard error in average % disorder for proteins in a given window of correlation and stability as shown in Figure 3c. Gray regions indicate undefined values.

b) Correlation coefficient and stability of disordered proteins (disorder  $\geq 30\%$ ) and ordered proteins (disorder  $< 30\%$ ) with average values specified in the boxes.

Differences between average correlation and stability in disordered and ordered proteins are statistically significant at  $p = 1.745e^{-6}$  and  $p = 6.417e^{-4}$ , respectively (Wilcoxon rank sum test).

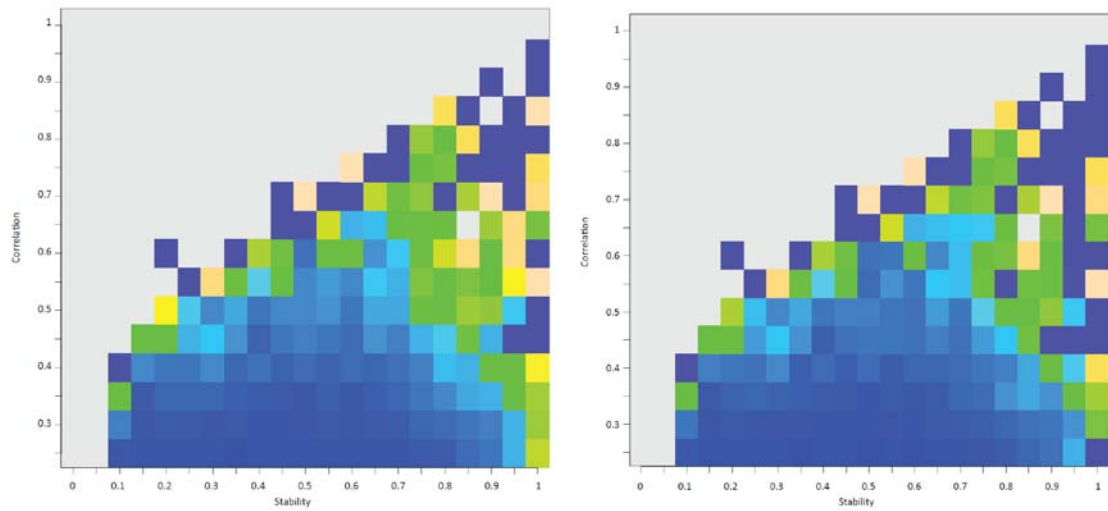

a)

b)

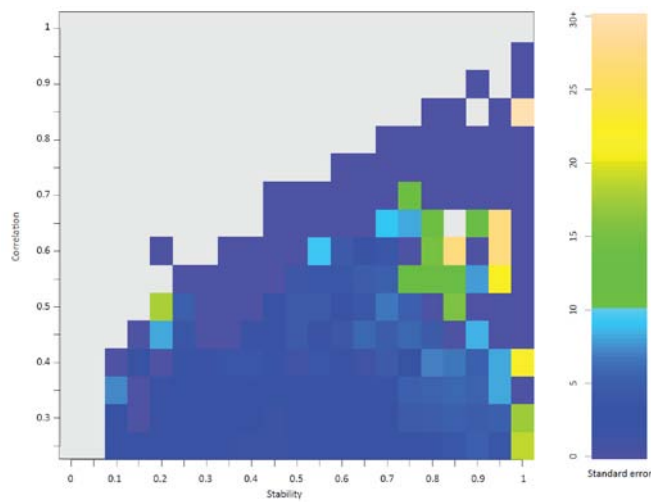

c)

Figure S4. Standard error values for the fraction of interactions in a given window of correlation and stability as shown in Figure 4 for types a) O-O: both interacting proteins have less than 30% intrinsic disorder, b) D-O: one of the interacting proteins has  $\geq 30\%$  intrinsic disorder and c) D-D: both interacting proteins have  $\geq 30\%$  intrinsic disorder. Gray regions indicate undefined values.

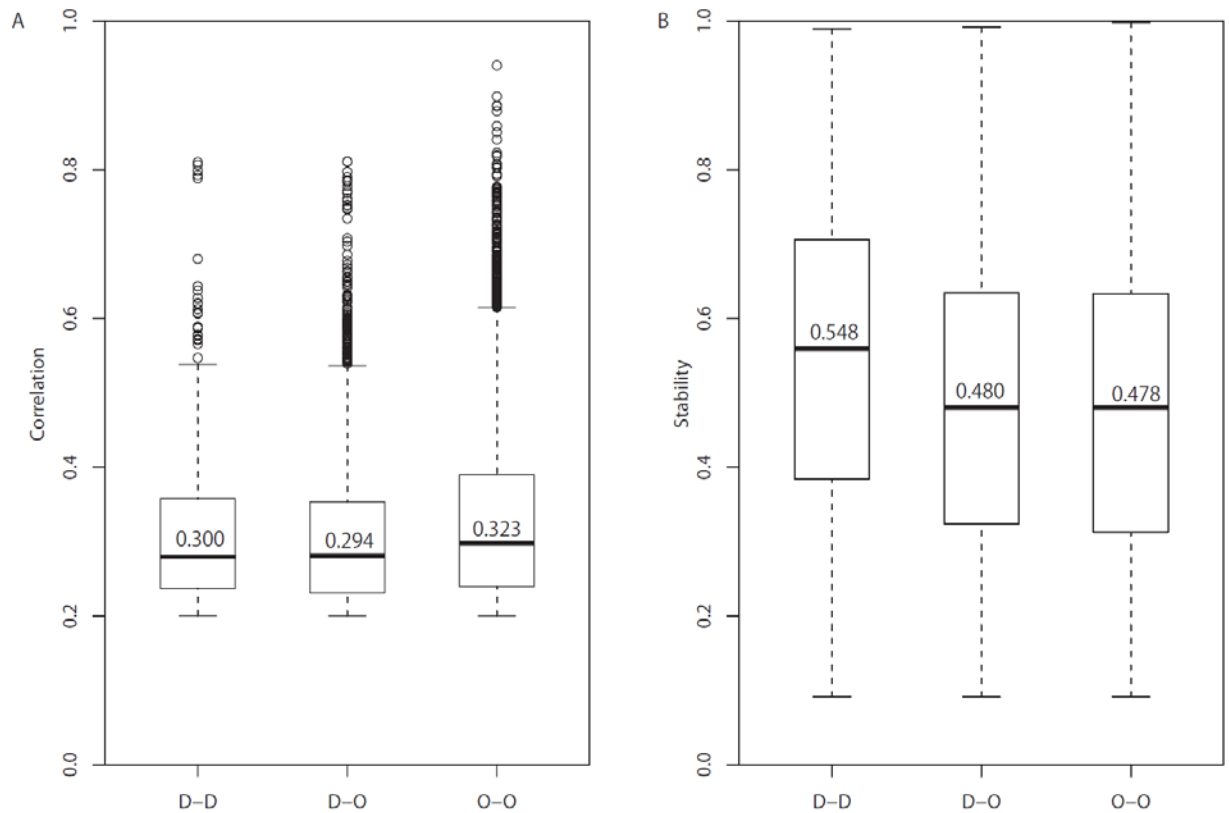

Figure S5. Coexpression correlation and stability for interacting protein pairs with varying levels of intrinsic disorder with average values specified in the boxplots. D-D: both interacting proteins have  $\geq 30\%$  intrinsic disorder; D-O: one of the interacting proteins has  $\geq 30\%$  intrinsic disorder; O-O: both interacting proteins have less than  $30\%$  intrinsic disorder. The difference in the average correlation coefficient between D-D and O-O ( $p = 0.0001$ ), and D-O and O-O ( $p = 1.44e^{-13}$ ) is statistically significant. The difference in the average stability is significant between D-D and O-O ( $p = 4.67e^{-15}$ ) and, D-D and D-O ( $p = 1.44e^{-13}$ ). Statistical significance calculated by the Wilcoxon rank sum test.

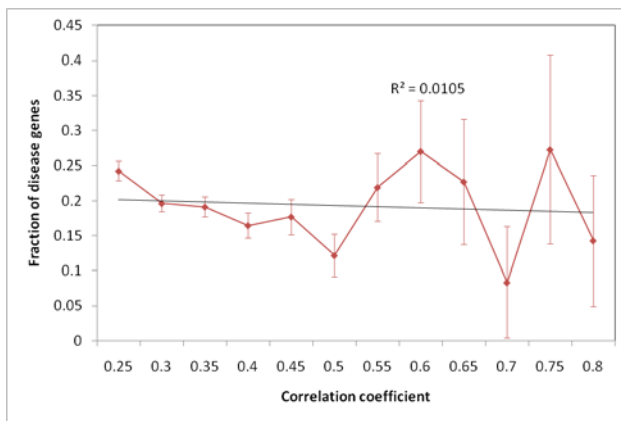

a)

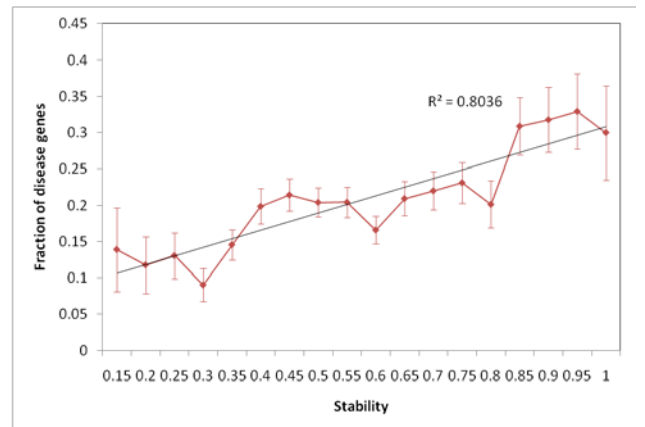

b)

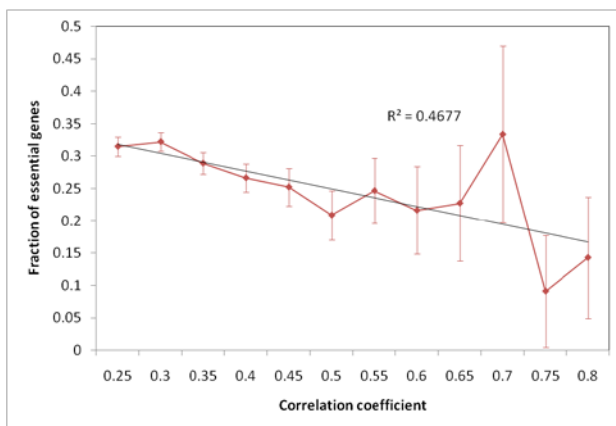

c)

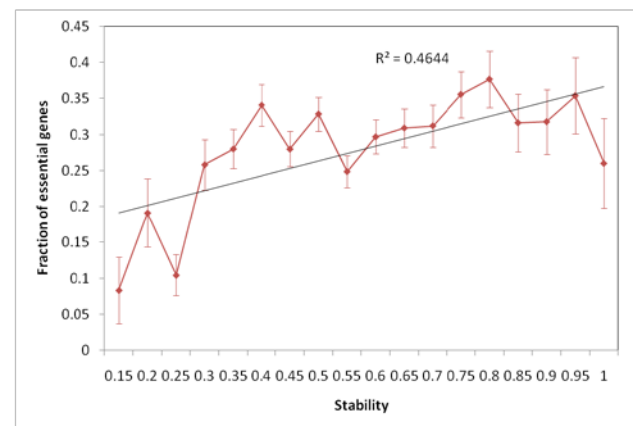

d)

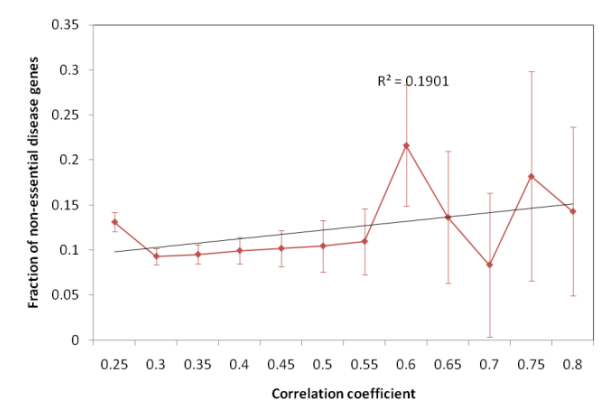

e)

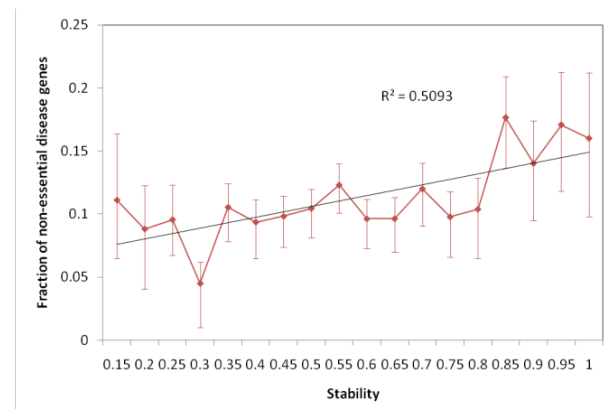

f)

Figure S6. Fraction of disease genes with the indicated average co-expression a) correlation and b) stability. Fraction of essential genes with the indicated average co-expression c) correlation and d) stability. Fraction of non-essential disease genes with the indicated average co-expression e) correlation and f) stability.

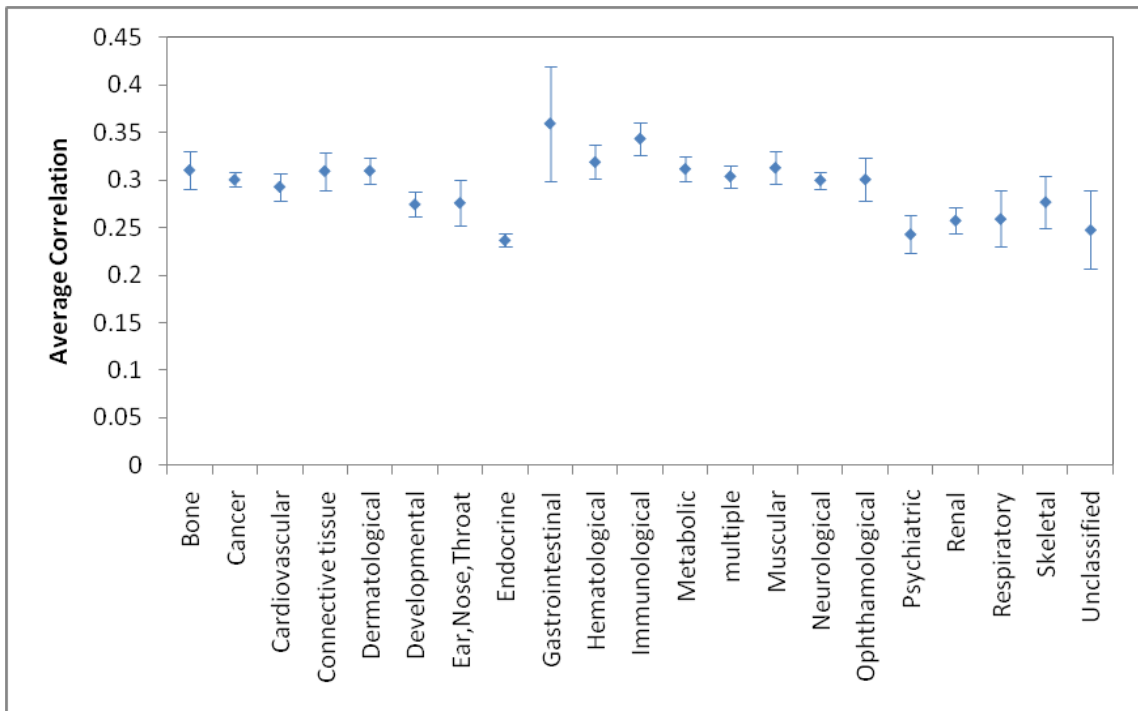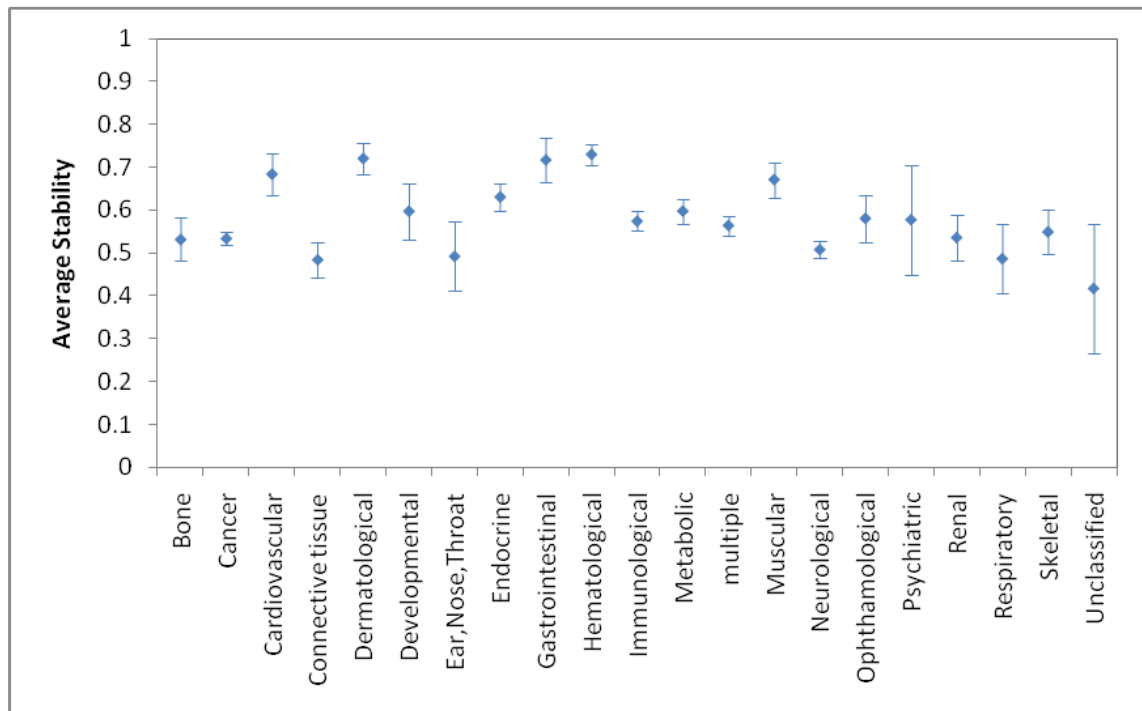

Figure S7. Average co-expression correlation and stability for genes in different disease classes. Error bars indicate standard error.

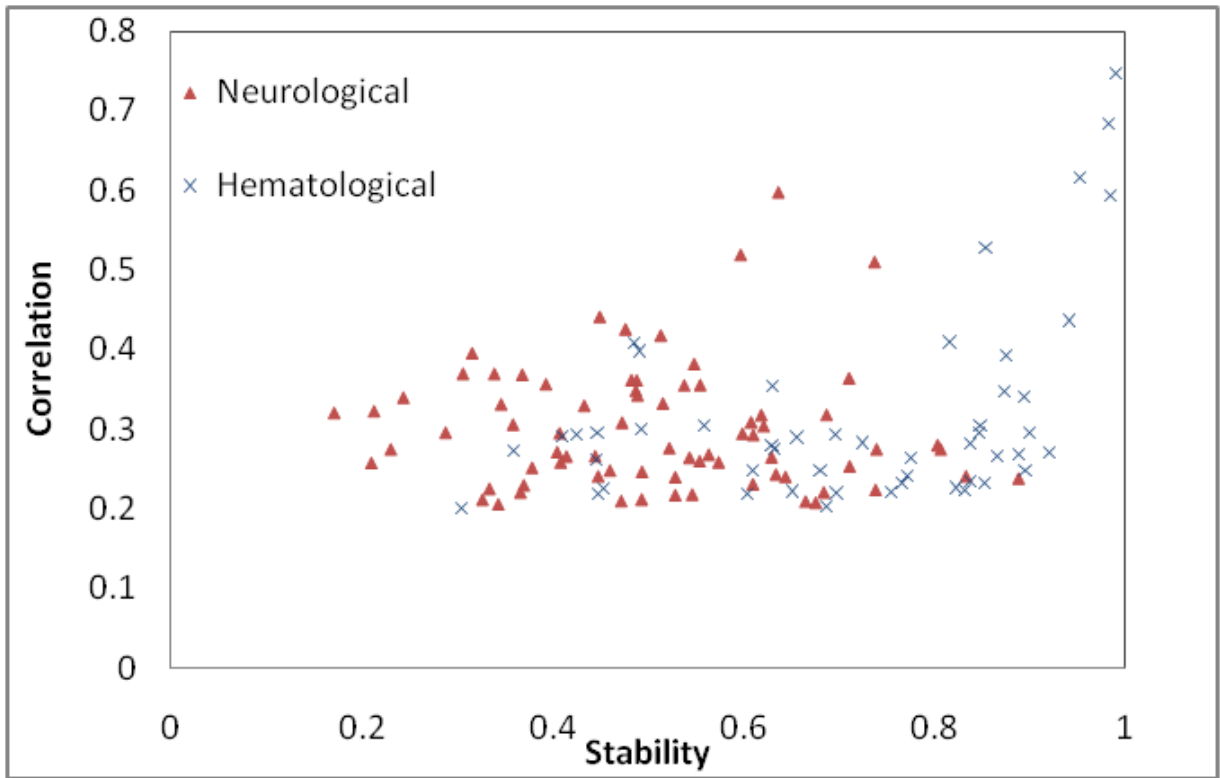

a)

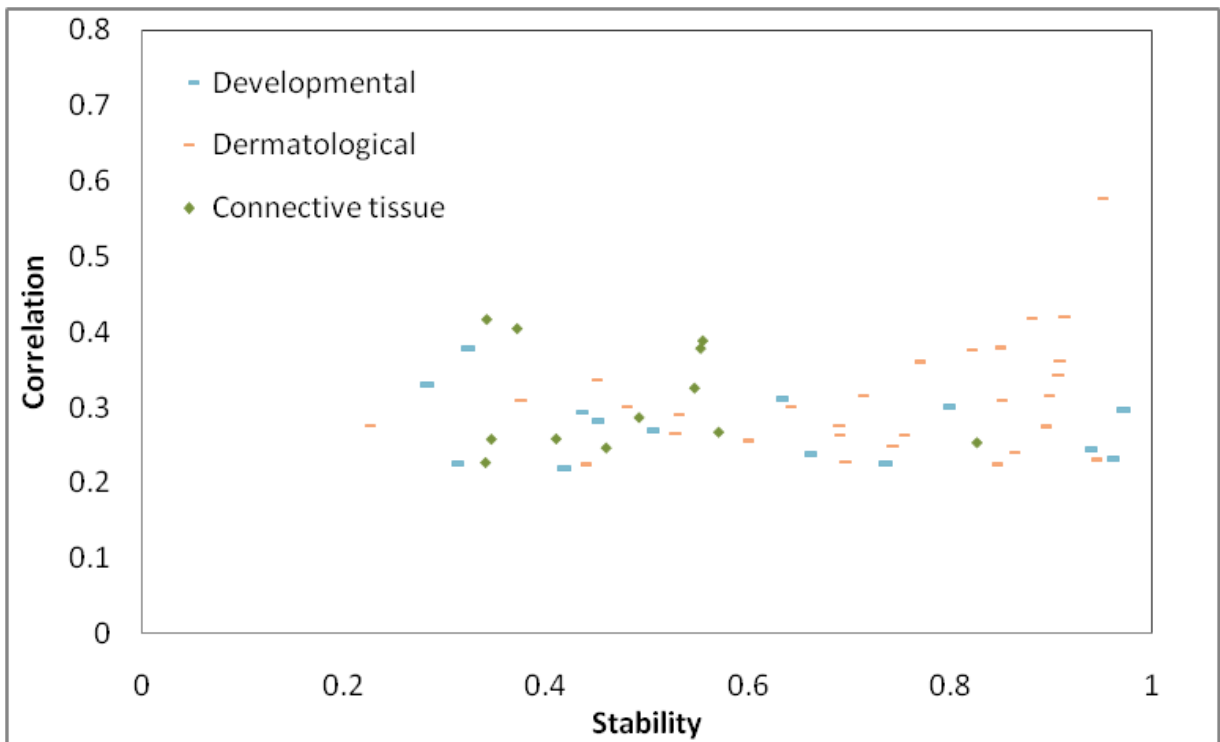

b)



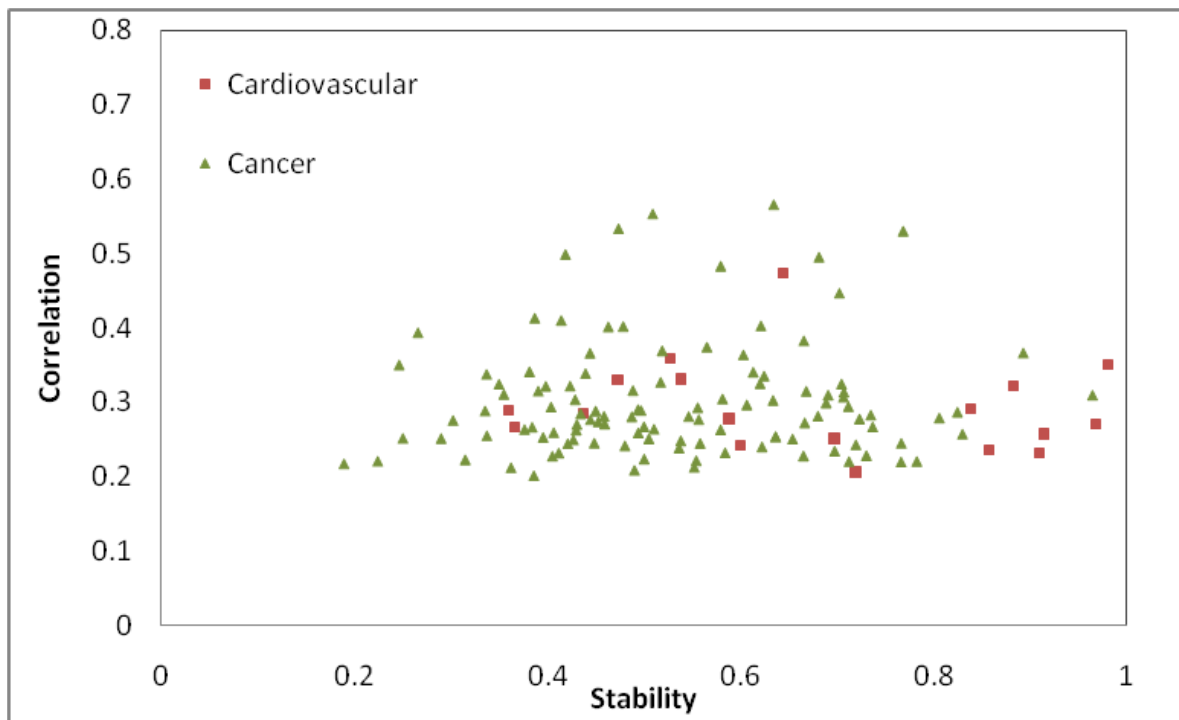

c)

**Figure S8** Differences in patterns of average coexpression correlation and stability for genes implicated in a)neurological and hematological diseases, b)developmental, dermatological and connective tissue related diseases, and c) cardiovascular diseases and cancer.

## Supplementary Tables

| Interaction Category | Correlation | Stability  | Number of interactions | Number of proteins | Number of unique hubs |
|----------------------|-------------|------------|------------------------|--------------------|-----------------------|
| 1                    | > 0.5       | > 0.5      | 564                    | 530                | 49                    |
| 2                    | $\leq 0.5$  | > 0.5      | 3026                   | 2595               | 264                   |
| 3                    | $\leq 0.5$  | $\leq 0.5$ | 3416                   | 2198               | 315                   |
| 4                    | > 0.5       | $\leq 0.5$ | 92                     | 121                | 4                     |

**Table S1.** Number of interactions, proteins and unique hubs in each category based on the coexpression correlation and stability of each pair of interacting proteins. Hubs in each category are defined as proteins that have at least 5 interactions that satisfy the conditions of coexpression correlation and stability with other proteins.

**Table S2.** Top GO Biological Process terms significantly enriched in hubs in different categories (p < 0.01)

| Category 1 hubs |                                                                                                | Category 2 hubs |                                                          | Category 3 hubs |                                                          |
|-----------------|------------------------------------------------------------------------------------------------|-----------------|----------------------------------------------------------|-----------------|----------------------------------------------------------|
| GO:0031145      | anaphase-promoting complex-dependent proteasomal ubiquitin-dependent protein catabolic process | GO:0044419      | interspecies interaction between organisms               | GO:0000398      | nuclear mRNA splicing, via spliceosome                   |
| GO:0051437      | positive regulation of ubiquitin-protein ligase activity during mitotic cell cycle             | GO:0007265      | Ras protein signal transduction                          | GO:0006367      | transcription initiation from RNA polymerase II promoter |
| GO:0051436      | negative regulation of ubiquitin-protein ligase activity during mitotic cell cycle             | GO:0043123      | positive regulation of I-kappaB kinase/NF-kappaB cascade | GO:0006368      | RNA elongation from RNA polymerase II promoter           |
| GO:0006270      | DNA replication initiation                                                                     | GO:0007242      | intracellular signaling cascade                          | GO:0000387      | spliceosomal snRNP biogenesis                            |
| GO:0007067      | mitosis                                                                                        | GO:0006468      | protein amino acid phosphorylation                       | GO:0006270      | DNA replication initiation                               |
| GO:0000076      | DNA replication checkpoint                                                                     | GO:0000398      | nuclear mRNA splicing, via spliceosome                   | GO:0051028      | mRNA transport                                           |
| GO:0007051      | spindle organization                                                                           | GO:0006916      | anti-apoptosis                                           | GO:0006397      | mRNA processing                                          |
| GO:0051301      | cell division                                                                                  | GO:0010033      | response to organic substance                            | GO:0006260      | DNA replication                                          |
| GO:0007049      | cell cycle                                                                                     | GO:0048167      | regulation of synaptic plasticity                        | GO:0006511      | ubiquitin-dependent protein catabolic process            |

**Table S3.** Top GO Molecular Function terms significantly enriched in hubs in different categories ( $p < 0.01$ )

| Category 1 hubs |                                               | Category 2 hubs |                                                        | Category 3 hubs |                                                         |
|-----------------|-----------------------------------------------|-----------------|--------------------------------------------------------|-----------------|---------------------------------------------------------|
| GO:0004298      | threonine-type endopeptidase activity         | GO:0005524      | ATP binding                                            | GO:0003723      | RNA binding                                             |
| GO:0017111      | nucleoside-triphosphatase activity            | GO:0004715      | non-membrane spanning protein tyrosine kinase activity | GO:0005515      | protein binding                                         |
| GO:0005515      | protein binding                               | GO:0008270      | zinc ion binding                                       | GO:0005524      | ATP binding                                             |
| GO:0005524      | ATP binding                                   | GO:0030235      | nitric-oxide synthase regulator activity               | GO:0003899      | DNA-directed RNA polymerase activity                    |
| GO:0043142      | single-stranded DNA-dependent ATPase activity | GO:0005057      | receptor signaling protein activity                    | GO:0003688      | DNA replication origin binding                          |
| GO:0000150      | recombinase activity                          | GO:0019904      | protein domain specific binding                        | GO:0000175      | 3'-5'-exoribonuclease activity                          |
| GO:0008121      | ubiquinol-cytochrome-c reductase activity     | GO:0005515      | protein binding                                        | GO:0016251      | general RNA polymerase II transcription factor activity |
| GO:0050699      | WW domain binding                             | GO:0016563      | transcription activator activity                       | GO:0042802      | identical protein binding                               |
| GO:0003677      | DNA binding                                   | GO:0003682      | chromatin binding                                      | GO:0047485      | protein N-terminus binding                              |

**Table S4.** Top GO Cellular Component terms significantly enriched in hubs in different categories (p < 0.01)

| Category 1 hubs |                                         | Category 2 hubs |                              | Category 3 hubs |                                         |
|-----------------|-----------------------------------------|-----------------|------------------------------|-----------------|-----------------------------------------|
| GO:0005839      | proteasome core complex                 | GO:0005829      | cytosol                      | GO:0005654      | nucleoplasm                             |
| GO:0005654      | nucleoplasm                             | GO:0005925      | focal adhesion               | GO:0005681      | spliceosome                             |
| GO:0005829      | cytosol                                 | GO:0042470      | melanosome                   | GO:0005829      | cytosol                                 |
| GO:0005634      | nucleus                                 | GO:0005886      | plasma membrane              | GO:0005643      | nuclear pore                            |
| GO:0000775      | chromosome, centromeric region          | GO:0005884      | actin filament               | GO:0030532      | small nuclear ribonucleoprotein complex |
| GO:0000794      | condensed nuclear chromosome            | GO:0005913      | cell-cell adherens junction  | GO:0030529      | ribonucleoprotein complex               |
| GO:0030532      | small nuclear ribonucleoprotein complex | GO:0005667      | transcription factor complex | GO:0005634      | nucleus                                 |
| GO:0042555      | MCM complex                             | GO:0042101      | T cell receptor complex      | GO:0005669      | transcription factor TFIID complex      |
| GO:0051233      | spindle midzone                         | GO:0005856      | cytoskeleton                 | GO:0000178      | exosome (RNase complex)                 |

| Interaction type | Count       |
|------------------|-------------|
| D-D              | 685         |
| D-O              | 2744        |
| O-O              | 4753        |
| <b>Total</b>     | <b>8182</b> |

**Table S5.** Number of interactions for each interaction type. D-D: both interacting proteins have  $\geq 30\%$  intrinsic disorder; D-O: one of the interacting proteins has  $\geq 30\%$  intrinsic disorder; O-O: both interacting proteins have less than 30% intrinsic disorder.

| Gene type    | Essential   | Non-essential | Total       |
|--------------|-------------|---------------|-------------|
| Disease      | 350         | 398           | 748         |
| Non-disease  | 746         | 2221          | 2967        |
| <b>Total</b> | <b>1096</b> | <b>2619</b>   | <b>3715</b> |

**Table S6.** Number of disease, essential, non-disease and non-essential genes used in this study.
